## Correction: The nuclear-cytoplasmic trafficking of a chromatin-modifying and remodelling protein (KMT2C), in osteosarcoma

**Caterina Chiappetta<sup>1</sup>, Chiara Puggioni<sup>1</sup>, Raffaella Carletti<sup>1</sup>, Vincenzo Petrozza<sup>1</sup>, Carlo Della Rocca<sup>1</sup> and Claudio Di Cristofano<sup>1</sup>**

<sup>1</sup> UOC of Pathology, Department of Medical-Surgical Sciences and Bio-Technologies, Sapienza University of Rome, Latina, Italy

**Published:** October 12, 2018

**Copyright:** Chiappetta et al. This is an open-access article distributed under the terms of the Creative Commons Attribution License 3.0 (CC BY 3.0), which permits unrestricted use, distribution, and reproduction in any medium, provided the original author and source are credited.

**This article has been corrected:** The correct author name is given below:

**Claudio Di Cristofano**

Original article: Oncotarget. 2018; 9:30624-30634. <https://doi.org/10.18632/oncotarget.25755>
